# Supplementary material
Source: PubMed Central journal article supplement (PMC4297595)
Supplement: NIHMS646812-supplement-supplement_1.pdf [file NIHMS646812-supplement-supplement_1.pdf]

**Supplemental Table 1.** Univariate Analysis of Overall Survival after Surgical Therapy for Lung Cancer

| Level                                  | Overall survival, mo |           |         |
|----------------------------------------|----------------------|-----------|---------|
|                                        | Hazard Ratio         | 95%CI     | P-value |
| Facility type                          |                      |           |         |
| Academic/Research Program              | 0.79                 | 0.77-0.82 | < 0.001 |
| Comprehensive Community Cancer Program | 0.86                 | 0.84-0.89 | < 0.001 |
| Community Cancer Program/Other         | -                    | -         | -       |
| Sex                                    |                      |           |         |
| Male                                   | 1.44                 | 1.41-1.46 | < 0.001 |
| Female                                 | -                    | -         | -       |
| Race/ethnicity                         |                      |           |         |
| Other                                  | 0.91                 | 0.78-1.05 | 0.183   |
| Hispanic                               | 0.90                 | 0.85-0.96 | 0.001   |
| Asian                                  | 0.80                 | 0.74-0.86 | < 0.001 |
| Black                                  | 1.01                 | 0.97-1.04 | 0.625   |
| White                                  | -                    | -         | -       |
| Age                                    | 1.03                 | 1.03-1.03 | < 0.001 |
| Insurance                              |                      |           |         |
| Not Insured                            | 1.31                 | 1.23-1.41 | < 0.001 |
| Govt. Insurance                        | 1.55                 | 1.52-1.58 | < 0.001 |
| Private Insurance                      | -                    | -         | -       |
| Income                                 |                      |           |         |
| < \$30,000                             | 1.26                 | 1.22-1.29 | < 0.001 |
| \$30,000 - \$34,999                    | 1.19                 | 1.16-1.22 | < 0.001 |
| \$35,000 - \$45,999                    | 1.12                 | 1.10-1.15 | < 0.001 |
| \$46,000 +                             | -                    | -         | -       |

|                          |      |           |         |
|--------------------------|------|-----------|---------|
| Education                |      |           |         |
| >=29%                    | 1.23 | 1.20-1.26 | < 0.001 |
| 20-28.9%                 | 1.16 | 1.14-1.19 | < 0.001 |
| 14-19.9%                 | 1.12 | 1.09-1.15 | < 0.001 |
| < 14%                    | -    | -         | -       |
| Urban/rural: rural       | 1.18 | 1.11-1.25 | < 0.001 |
| Setting                  |      |           |         |
| Urban                    | 1.10 | 1.08-1.13 | < 0.001 |
| Metro Area               | -    | -         | -       |
| Charlson/Deyo score      |      |           |         |
| 2+                       | 1.50 | 1.46-1.54 | < 0.001 |
| 1                        | 1.17 | 1.15-1.19 | < 0.001 |
| 0                        | -    | -         | -       |
| Analytic stage           |      |           |         |
| IV                       | 3.25 | 3.13-3.37 | < 0.001 |
| III                      | 2.17 | 2.12-2.22 | < 0.001 |
| II                       | 1.69 | 1.65-1.73 | < 0.001 |
| I                        | -    | -         | -       |
| Radiation before surgery |      |           |         |
| Yes                      | 1.44 | 1.39-1.50 | < 0.001 |
| No                       | -    | -         | -       |

|                                             |      |           |         |
|---------------------------------------------|------|-----------|---------|
| Primary tumor site                          |      |           |         |
| Tracheobronchial tree or hilum              | 1.11 | 1.02-1.22 | 0.017   |
| Left upper lobe                             | 1.07 | 1.05-1.10 | < 0.001 |
| Left lower lobe                             | 1.09 | 1.06-1.12 | < 0.001 |
| Right middle lobe                           | 0.85 | 0.82-0.89 | < 0.001 |
| Right lower lobe                            | 1.12 | 1.09-1.15 | < 0.001 |
| Overlapping lesion                          | 1.41 | 1.33-1.50 | < 0.001 |
| Not specified                               | 1.48 | 1.40-1.56 | < 0.001 |
| Right upper lobe                            | -    | -         | -       |
| Histology                                   |      |           |         |
| Unknown histology                           | 1.31 | 1.26-1.35 | < 0.001 |
| Other tumors <sup>†</sup>                   | 0.38 | 0.36-0.40 | < 0.001 |
| Large cell                                  | 1.38 | 1.32-1.43 | < 0.001 |
| Squamous cell                               | 1.27 | 1.25-1.30 | < 0.001 |
| Adenosquamous                               | 1.36 | 1.30-1.44 | < 0.001 |
| Adenocarcinoma                              | -    | -         | -       |
| Grade                                       |      |           |         |
| Unknown                                     | 1.27 | 1.22-1.32 | < 0.001 |
| 4                                           | 2.14 | 2.02-2.26 | < 0.001 |
| 3                                           | 1.98 | 1.92-2.05 | < 0.001 |
| 2                                           | 1.64 | 1.59-1.70 | < 0.001 |
| 1                                           | -    | -         | -       |
| Tumor size, cm                              | 1.02 | 1.02-1.02 | < 0.001 |
| Surgical procedure                          |      |           |         |
| Pneumonectomy                               | 1.16 | 1.12-1.20 | < 0.001 |
| Lobectomy                                   | 0.68 | 0.66-0.70 | < 0.001 |
| Segmental resection, including lingulectomy | 0.80 | 0.75-0.84 | < 0.001 |
| Wedge resection/less than one lobe          |      |           | -       |

|                              |      |           |         |
|------------------------------|------|-----------|---------|
| Positive surgical margins    |      |           |         |
| Yes                          | 2.23 | 2.17-2.30 | < 0.001 |
| No                           | -    | -         | -       |
| Scope of regional LN surgery |      |           |         |
| No regional LN surgery       | 1.42 | 1.38-1.46 | < 0.001 |
| Regional LN surgery          | -    | -         | -       |
| Regional LN positive         |      |           |         |
| Yes                          | 1.84 | 1.81-1.88 | < 0.001 |
| No                           | -    | -         | -       |
| Regional LN examined         |      |           |         |
| >9                           | 0.85 | 0.83-0.87 | < 0.001 |
| 7-9                          | 0.80 | 0.78-0.83 | < 0.001 |
| 4-6                          | 0.82 | 0.79-0.84 | < 0.001 |
| 0-3                          | -    | -         | -       |

<sup>†</sup>Including, but not restricted to spindle cell carcinoma, mucoepidermoid malignancies, neuroendocrine, and mixed malignant tumors; LN: Lymph Node

# Supplementary Figure 1

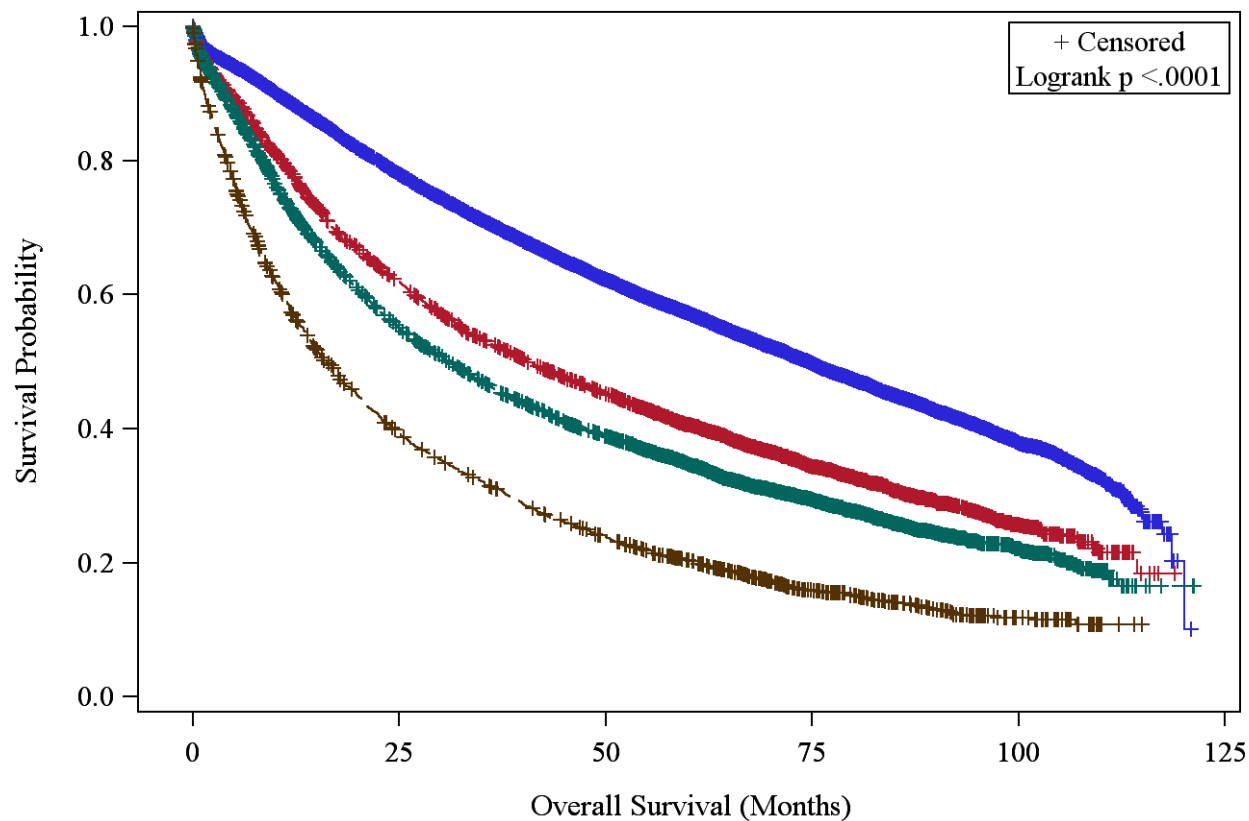

AJCC Clinical Stage Group — I — II — III — IV

| AJCC Clinical Stage Group | No. of Subject | Event       | Censored    | Median Survival (95% CI) |
|---------------------------|----------------|-------------|-------------|--------------------------|
| I                         | 24586          | 12422 (51%) | 12164 (49%) | 74.6 (73, 75.6)          |
| II                        | 4644           | 2993 (64%)  | 1651 (36%)  | 40.3 (38.3, 43.2)        |
| III                       | 6607           | 4601 (70%)  | 2006 (30%)  | 31 (29.4, 32.5)          |
| IV                        | 2187           | 1790 (82%)  | 397 (18%)   | 16.3 (14.8, 17.7)        |

# Supplementary Figure 2

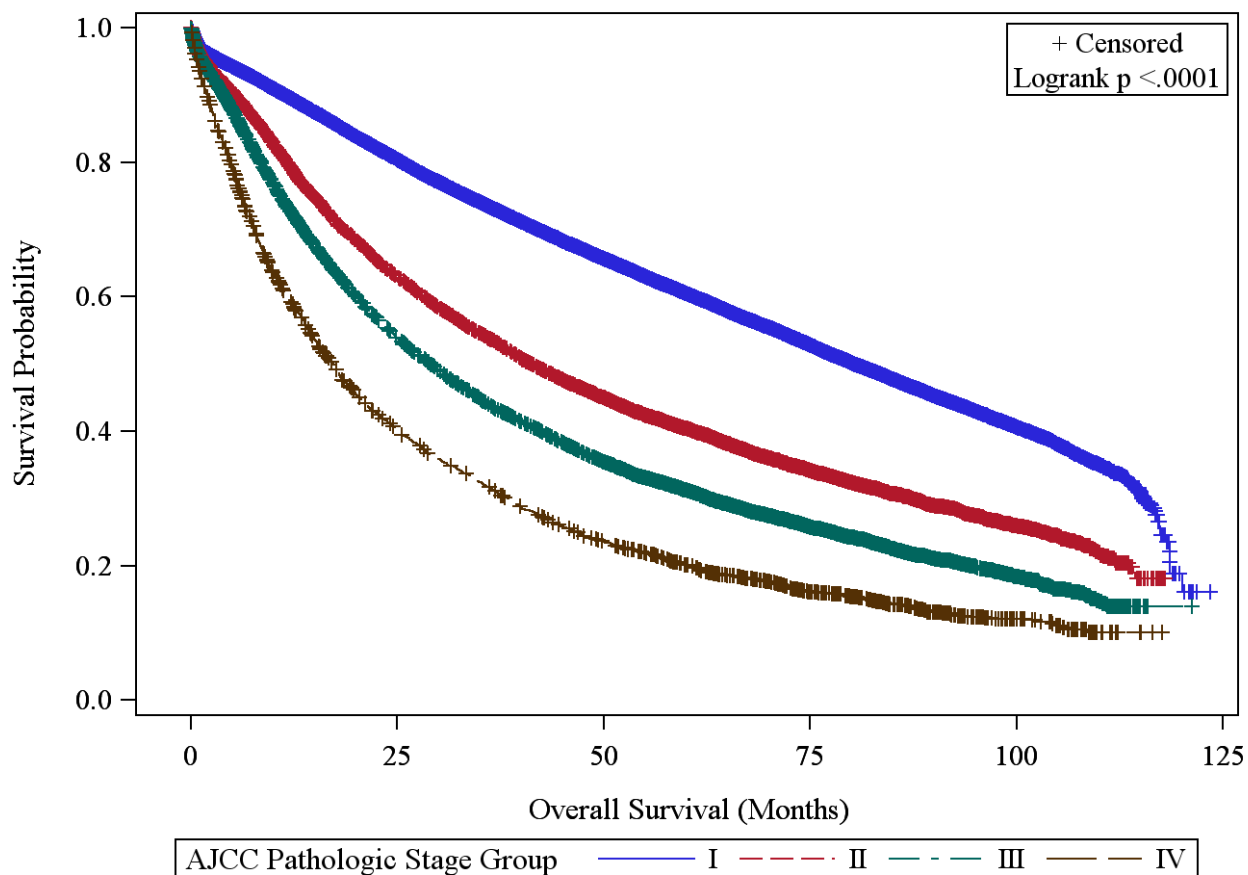

| AJCC Pathologic Stage Group | No. of Subject | Event       | Censored    | Median Survival (95% CI) |
|-----------------------------|----------------|-------------|-------------|--------------------------|
| I                           | 51216          | 24417 (48%) | 26799 (52%) | 80.3 (79.5, 81.4)        |
| II                          | 13369          | 8696 (65%)  | 4673 (35%)  | 41.3 (40, 42.6)          |
| III                         | 11987          | 8775 (73%)  | 3212 (27%)  | 28.9 (28, 30)            |
| IV                          | 3253           | 2675 (82%)  | 578 (18%)   | 17.2 (16, 18.1)          |
